# Supplementary material for: Highly active and stable copper catalysts derived from copper silicate double-shell nanofibers with strong metal–support interactions for the RWGS reaction
Source: Royal Society of Chemistry journal article supplement (doi:10.1039/c9cc00297a), 2019-01-01
Supplement: c9cc00297a1.pdf [file c9cc00297a1.pdf]

## Electronic Supplementary Information

### **Highly active and stable copper catalysts derived from copper silicate double-shell nanofibers with strong metal-support interaction for RWGS reaction**

Yang Yu,<sup>a</sup> Renxi Jin,<sup>\*b</sup> Justin Easa,<sup>b</sup> Wei Lu,<sup>a</sup> Man Yang,<sup>a</sup> Xianchun Liu,<sup>a</sup> Yan Xing<sup>\*a</sup> and Zhan Shi<sup>\*c</sup>

<sup>a</sup> *Jilin Provincial Key Laboratory of Advanced Energy Materials, Department of Chemistry, Northeast Normal University, Changchun 130024, China.*

<sup>b</sup> *Department of Chemical and Biomolecular Engineering, University of Notre Dame, Notre Dame, Indiana 46556, USA.*

<sup>c</sup> *College of Chemistry, Jilin University, State Key Laboratory of Inorganic Synthesis and Preparative, Changchun 130022, China.*

#### **Experimental**

**Synthesis of SiO<sub>2</sub> hollow nanofibers.** The SiO<sub>2</sub> hollow nanofibers were prepared through a single capillary electrospinning method. 0.95 g of polyvinylpyrrolidone (PVP,  $M_n = 1300000$ ) was completely dissolved in 10 mL of ethanol. After stirring for several minutes, 1.6 ml of tetraethylorthosilicate (TEOS) was slowly added to form a homogeneous solution. Then, the precursor was transferred into a plastic syringe for electrospinning under the voltage of 9.5 kV and the products were collected at a distance about 20 cm to the syringe tip. Finally, the composites of PVP/TEOS were calcined in the air at 550 °C for 2 h to obtain SiO<sub>2</sub> hollow nanofibers.

**Synthesis of hierarchical double-shells CuSiO hollow nanofibers.** The hierarchical double-shells CuSiO hollow nanofibers were prepared through a simple hydrothermal process. In brief, copper acetate monohydrate (0.2 mmol), ammonia chloride (2 mmol) and NH<sub>3</sub>·H<sub>2</sub>O (0.2 mL, 28%) were added to 10 mL distilled water and transferred into a 15 mL Teflon-lined autoclave after full mixing with as-prepared SiO<sub>2</sub> hollow nanofibers (0.02 g). The autoclave was sealed and maintained at 140 °C for 10 h, the

resulting light blue precipitates were collected and washed several times with distilled water and absolute ethanol. The final products were dried at 60 °C for 12 h.

**Synthesis of CuSiO/CuO<sub>x</sub> hollow nanofibers.** The CuSiO/CuO<sub>x</sub> hollow nanofibers were prepared through a simple hydrogen reduction process. The obtained products were placed in a porcelain boat, and then calcined at 350 °C for 2 hours in a tubing furnace under H<sub>2</sub>/Ar (5% H<sub>2</sub>, 95% Ar) mixed atmosphere. The final black products were CuSiO/CuO<sub>x</sub> hollow nanofibers. Conventional SiO<sub>2</sub>/Cu and TiO<sub>2</sub>/Cu catalysts were prepared by impregnation method. 0.85 g of fused SiO<sub>2</sub> or TiO<sub>2</sub> power was impregnated by soaking the powders in a solution of 0.57 g of Cu(NO<sub>3</sub>)<sub>2</sub>·3H<sub>2</sub>O in a sealed vial, followed by drying. Then, the obtained powers were calcined at 350 °C for 2 hours in a tubing furnace under H<sub>2</sub>/Ar mixed atmosphere, too. The surface composition of copper was determined to be 15 wt% from the XPS data.

**Catalyst Evaluation for the RWGS Reaction.** The RWGS reaction was conducted under atmospheric pressure in a quartz-tube fixed bed reactor (i.d. 4 mm). A 20 mg amount of the catalyst was used for one batch. A gas mixture of 4% Ar, 24% CO<sub>2</sub> and 72% H<sub>2</sub> was passed through the catalyst bed at a flow rate of 20 mL/min. The products were analyzed by an online gas chromatograph (Agilent 7820) equipped with a TCD detector. The outlet gas flow rate was determined by the inner standard method, in which the CH<sub>4</sub>, CO, and CO<sub>2</sub> were calculated based on the flow rate of inner gas (Ar). CO<sub>2</sub> conversion was calculated from the measured CO<sub>2</sub> concentration using the formula  $\text{CO}_2 \text{ conversion} = [(\text{CO}_{2\text{in}} - \text{CO}_{2\text{out}})/\text{CO}_{2\text{in}}]$ , where CO<sub>2in</sub> and CO<sub>2out</sub> were the inlet and outlet CO<sub>2</sub> concentration, respectively.

**Characterization.** Siemens D5005 Diffractometer was used to record the X-ray diffraction (XRD) patterns. Transmission electron microscopic (TEM) images and high angle annular dark field STEM (HAADF-STEM) image were obtained on a JEM-2100F microscope. Scanning electron microscopy (SEM) images were obtained on XL30 ESEM FEG microscope. Elemental analysis was performed with a TJAPOEMS spectrometer. X-ray photoelectron spectroscopy (XPS) was analyzed on Thermo ESCALAB 250 XPS instrument. The Brunauer-Emmett-Teller (BET) surface area of the samples was performed on Micromeritics Tristar 3000 analyzer at 77.4 K.

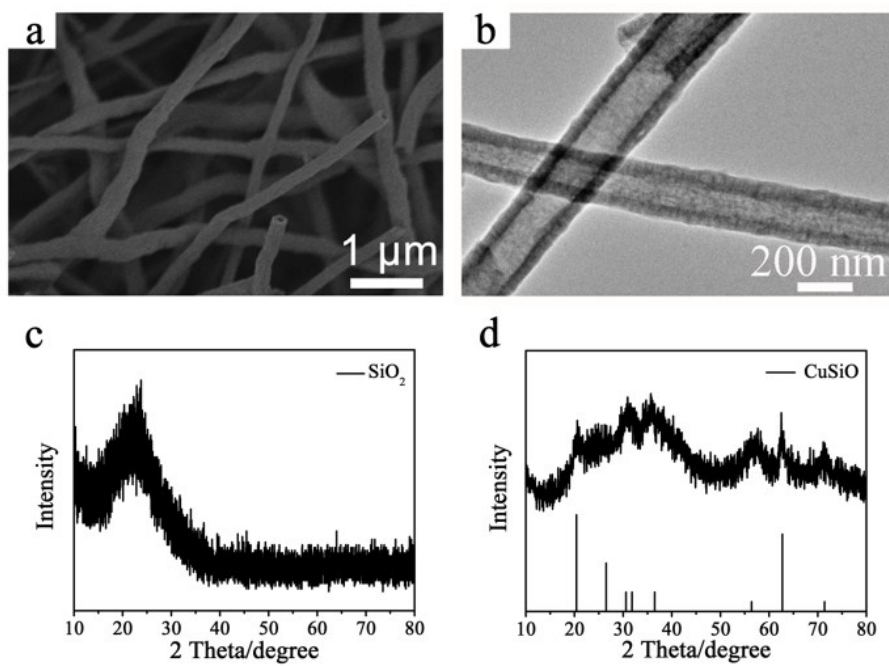

Fig. S1 Typical SEM (a) and TEM (b) images of  $\text{SiO}_2$  nanofibers; XRD patterns of (c)  $\text{SiO}_2$  and (d)  $\text{CuSiO}$  nanofibers.

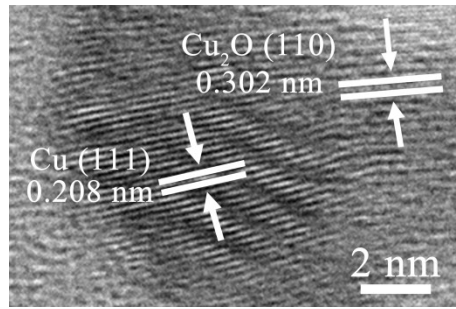

Fig. S2 HRTEM image of the  $\text{CuO}_x$  nanoparticles.

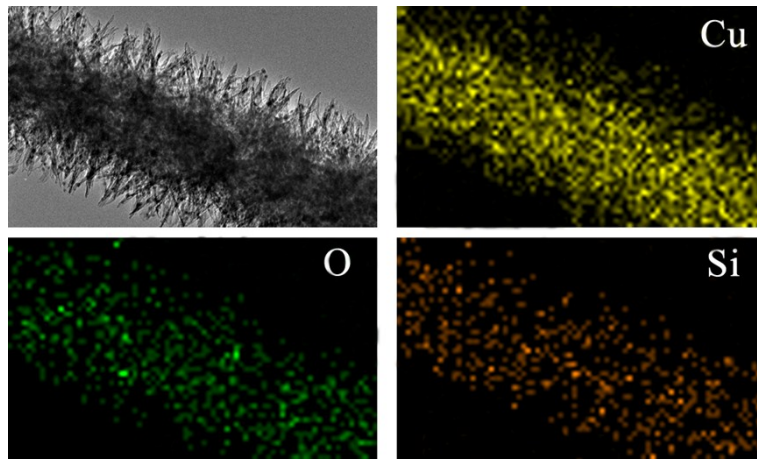

Fig. S3 Mapping of elements by EDX analysis of  $\text{CuSiO}/\text{CuO}_x$

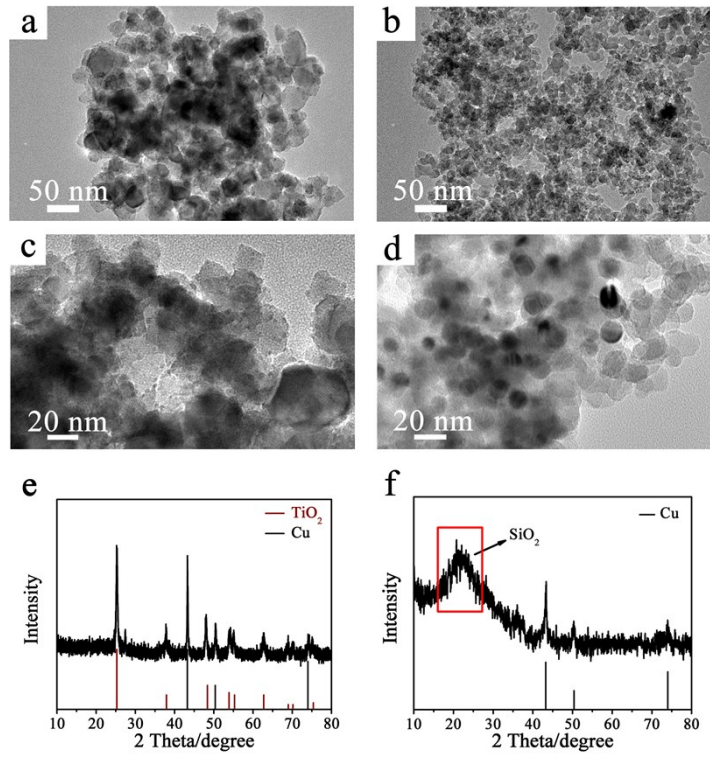

Fig. S4 Typical TEM images of (a, c) TiO<sub>2</sub>/Cu and (b, d) SiO<sub>2</sub>/Cu; XRD patterns of (e) TiO<sub>2</sub>/Cu and (f) SiO<sub>2</sub>/Cu.

Table S1 Catalytic activities of the CuSiO/CuO<sub>x</sub> compared with reported conventional catalysts toward the RWGS

| Catalyst                                         | Temperature (°C) | Activity (10 <sup>-5</sup><br>mol <sub>CO2</sub> /g <sub>cat</sub> /s) | References |
|--------------------------------------------------|------------------|------------------------------------------------------------------------|------------|
| CuSiO/CuO <sub>x</sub>                           | 500              | 3.18                                                                   | This work  |
| TiO <sub>2</sub> /Cu                             | 500              | 1.78                                                                   | This work  |
| SiO <sub>2</sub> /Cu                             | 500              | 1.11                                                                   | This work  |
| Cu/Al <sub>2</sub> O <sub>3</sub>                | 500              | 0.9                                                                    | 1          |
| Cu/Al <sub>2</sub> O <sub>3</sub>                | 600              | 3.1                                                                    | 2          |
| CuO <sub>x</sub> /CeO <sub>2</sub>               | 550              | 1.23                                                                   | 3          |
| Cu-CeO <sub>2</sub>                              | 400              | 2.23                                                                   | 4          |
| Cu/β-Mo <sub>2</sub> C                           | 500              | 1.64                                                                   | 5          |
| Cu/mesoporous silica                             | 400              | 0.167                                                                  | 6          |
| Cu/SiO <sub>2</sub>                              | 500              | 3.34                                                                   | 7          |
| Cu/SiO <sub>2</sub>                              | 600              | 1.49                                                                   | 8          |
| Fe/SiO <sub>2</sub>                              | 600              | 0.744                                                                  | 8          |
| CuFe/Al <sub>2</sub> O <sub>3</sub>              | 400              | 2.67                                                                   | 9          |
| Ni/Ce-Zr-O                                       | 550              | 2.17                                                                   | 10         |
| In <sub>2</sub> O <sub>3</sub>                   | 500              | 2.38                                                                   | 11         |
| CeO <sub>2</sub>                                 | 500              | 1.34                                                                   | 11         |
| In <sub>2</sub> O <sub>3</sub> -CeO <sub>2</sub> | 500              | 2.98                                                                   | 11         |

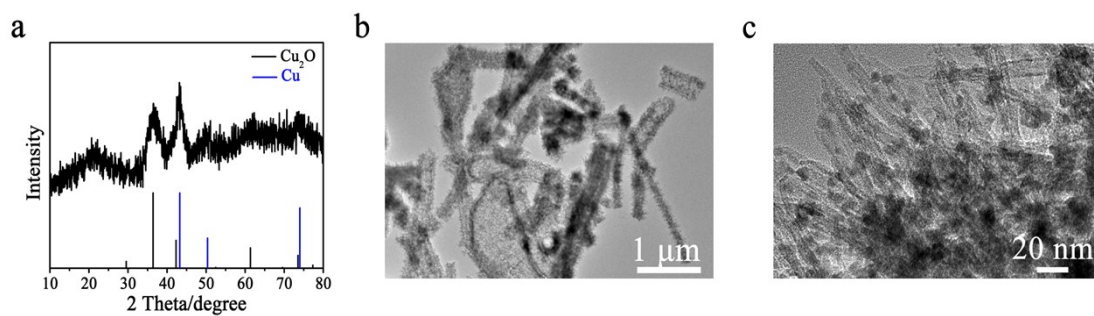

Fig. S5 XRD (a) patterns and TEM (b, c) images of  $\text{CuSiO}/\text{CuO}_x$  catalysts after stability test.



## References

- [1] Mechanism of CO formation in reverse water–gas shift reaction over Cu/Al<sub>2</sub>O<sub>3</sub> catalyst. *Catalysis Letters*, 68 (2000) 45–48.
- [2] Catalytic behavior of metal catalysts in high-temperature RWGS reaction: In-situ FT-IR experiments and first-principles calculations. *SCIENTIFIC REPORTS*, 2017, 7, 41207.
- [3] CuO<sub>x</sub>/CeO<sub>2</sub> catalyst derived from metal organic framework for reverse water-gas shift reaction. *Applied Catalysis A, General*, 562 (2018) 28–36.
- [4] CO<sub>2</sub> Reverse Water-Gas Shift Reaction on Mesoporous M-CeO<sub>2</sub> Catalysts. *CANADIAN JOURNAL OF CHEMICAL ENGINEERING*, 95 (2017) 634-642.
- [5] Understanding the promoter effect of Cu and Cs over highly effective β-Mo<sub>2</sub>C catalysts for the reverse water-gas shift reaction. *Applied Catalysis B: Environmental*, 244 (2019) 889–898.
- [6] CeCu composite catalyst for CO synthesis by reverse water–gas shift reaction: Effect of Ce/Cu mole ratio. *Journal of CO<sub>2</sub> Utilization*, 21 (2017) 292–301.
- [7] Study of reverse water gas shift reaction by TPD, TPR and CO<sub>2</sub> hydrogenation over potassium-promoted Cu/SiO<sub>2</sub> catalyst. *Applied Catalysis A: General*, 238 (2003) 55–67.
- [8] Study of iron-promoted Cu/SiO<sub>2</sub> catalyst on high temperature reverse water gas shift reaction. *Applied Catalysis A: General*, 257 (2004) 97–106.
- [9] CO<sub>2</sub> valorisation via Reverse Water-Gas Shift reaction using advanced Cs doped Fe-Cu/Al<sub>2</sub>O<sub>3</sub> catalysts. *Journal of CO<sub>2</sub> Utilization*, 21 (2017) 423–428.
- [10] Ni/Ce-Zr-O catalyst for high CO<sub>2</sub> conversion during reverse water gas shift reaction (RWGS). *International Journal of Hydrogen Energy*, 40 (2015) 15985-15993.
- [11] Reverse water gas shift over In<sub>2</sub>O<sub>3</sub>–CeO<sub>2</sub> catalysts. *Catalysis Today*, 259 (2016) 402–408.
